# Supplementary material
Source: PubMed Central journal article supplement (PMC9822985)
Supplement: NIHMS1676626-supplement-SI.pdf [file NIHMS1676626-supplement-SI.pdf]

1 **Supplemental**

2 **Table S1. Individual fish data for microsomal and liver slice preparations.**

| <b>RBT Liver Slices</b> |                 |             |            |                 |                        |                         |                |
|-------------------------|-----------------|-------------|------------|-----------------|------------------------|-------------------------|----------------|
| <b>Date</b>             | <b>Chemical</b> | <b>fish</b> | <b>sex</b> | <b>maturity</b> | <b>body weight (g)</b> | <b>liver weight (g)</b> | <b>HSI (%)</b> |
| Sept 27 2017            | AC              | 1           | M          | immature        | 369                    | 3.31                    | 0.90           |
| Oct 16 2017             | AC              | 1           | M          | immature        | 417                    | 3.9                     | 0.94           |
| Jan 23 2018             | IMI             | 1           | F          | 1/3             | 541                    | 6.7                     | 1.24           |
| Nov 30 2018             | AC, IMI         | 1           | M          | immature        | 425                    | 3.65                    | 0.86           |
| Jan 30 2019             | AC, IMI         | 1           | M          | immature        | 435                    | 5.02                    | 1.15           |
| Feb 7 2019              | AC, IMI         | 1           | M          | immature        | 401                    | 4.6                     | 1.15           |
| Feb 7 2019              | AC, IMI         | 2           | F          | 1/3             | 412                    | 4.69                    | 1.14           |
|                         |                 |             |            |                 |                        |                         |                |
| <b>RBT usomes</b>       |                 |             |            |                 |                        |                         |                |
| <b>Date</b>             | <b>Chemical</b> | <b>fish</b> | <b>sex</b> | <b>maturity</b> | <b>body weight (g)</b> | <b>liver weight (g)</b> | <b>HSI (%)</b> |
| April 9 2018            |                 | 2           | F          | 1/3             | 512                    | 5.5                     | 1.07           |
|                         |                 | 3           | M          | 1/6             | 624                    | 7.3                     | 1.17           |
|                         |                 | 5           | F          | 1/4             | 524                    | 6.1                     | 1.16           |
|                         |                 | 6           | F          | 1/4             | 571                    | 5.3                     | 0.93           |
|                         |                 | 7           | M          | immature        | 600                    | 5.8                     | 0.97           |
| July 16 2018            |                 | 1           | F          | 1/3             | 657                    | 5.5                     | 0.84           |
|                         |                 | 2           | M          | 1/8             | 494                    | 4.7                     | 0.95           |
|                         |                 | 3           | M          | immature        | 406                    | 3.11                    | 0.77           |
|                         |                 | 4           | M          | immature        | 599                    | 6.02                    | 1.01           |
|                         |                 | 6           | M          | immature        | 769                    | 7.45                    | 0.97           |
| Aug 27 2018             |                 | 2           | F          | 1/3             | 931                    | 8.3                     | 0.89           |
|                         |                 | 3           | M          | immature        | 832                    | 7.49                    | 0.90           |
|                         |                 | 4           | F          | immature        | 512                    | 4.2                     | 0.82           |
|                         |                 | 5           | F          | 1/3             | 600                    | 6.7                     | 1.12           |
|                         |                 | 6           | M          | 1/3             | 669                    | 5.15                    | 0.77           |
| Sept 4 2018             |                 | 1           | M          | immature        | 315                    | 3.7                     | 1.17           |
|                         |                 | 2           | M          | immature        | 310                    | 3.28                    | 1.06           |
|                         |                 | 4           | F          | 1/4             | 267                    | 2.8                     | 1.05           |
|                         |                 | 5           | M          | 1/4             | 349                    | 2.98                    | 0.85           |
|                         |                 | 6           | M          | immature        | 289                    | 2.6                     | 0.90           |
|                         |                 | 7           | F          | 1/3             | 262                    | 2.28                    | 0.87           |
|                         |                 | 8           | M          | 1/3             | 261                    | 2.47                    | 0.95           |
|                         |                 | 9           | F          | 1/3             | 196                    | 1.9                     | 0.97           |

|  |  |    |   |          |     |      |      |
|--|--|----|---|----------|-----|------|------|
|  |  | 11 | M | immature | 250 | 2.07 | 0.83 |
|--|--|----|---|----------|-----|------|------|

3

4 **Table S2. Experimental conditions for HPLC and LC-MS**

| <b>Thermo <math>\mu</math>HPLC</b>                                                                                                                                                                 | <b>Agilent <math>\mu</math>HPLC</b>                                                                                   | <b>Agilent LC-MS</b>                                                                                                                                                                                                                                                                                                                                                                                               |
|----------------------------------------------------------------------------------------------------------------------------------------------------------------------------------------------------|-----------------------------------------------------------------------------------------------------------------------|--------------------------------------------------------------------------------------------------------------------------------------------------------------------------------------------------------------------------------------------------------------------------------------------------------------------------------------------------------------------------------------------------------------------|
| <b>Column:</b> Phenomenex, Synergi Hydro RP, 50x2 mm, 2.5 $\mu$ m                                                                                                                                  | <b>Column:</b> Agilent Poroshell EC-18, 50x3 mm, 2.7 $\mu$ m                                                          | <b>ESI:</b> capillary, tube lens, cone, and extractor at 3000, 0.1, 65 and 3.7 V, respectively; capillary voltage and temperature: 2kV and 325°C, respectively. N <sub>2</sub> sheath 30 psi, N <sub>2</sub> auxiliary 10 psi. CID at 20 and 30 eV (N <sub>2</sub> ) with 2 scans at each CID. Product ion scans only. Mass range for products: 50-275 <i>m/z</i> . Desolvation temperature: 350°C, 11L/ min flow. |
| <b>Flow rate:</b> 0.750 mL/min<br>Injection volume: 50 $\mu$ L                                                                                                                                     | <b>Flow Rate:</b> 0.4 mL/min<br>Injection volume: 1 $\mu$ L                                                           |                                                                                                                                                                                                                                                                                                                                                                                                                    |
| <b>Program:</b> 8.1 min Gradient                                                                                                                                                                   | <b>Program:</b> 3 min Isocratic                                                                                       |                                                                                                                                                                                                                                                                                                                                                                                                                    |
| <b>Mobile phases:</b><br>A: 0.5% ACN, 20 mM NH <sub>4</sub> OAc in water, pH 5.0 B: 95% ACN, 10 mM NH <sub>4</sub> OAc in water 0-3.0 min 0% B; 3.0-3.1 min 15% B; 3.1-6.1 min 25% B; 7.1 min 0% B | <b>Mobile phases:</b><br>A: 4% ACN, 1% Acetic acid in water, pH 4.0.<br>B: 99% ACN, 1% Acetic acid in water           |                                                                                                                                                                                                                                                                                                                                                                                                                    |
| <b>DAD:</b> 245 and 266 nm<br>Acetamiprid and N-Desmethyl metabolite @245 nm<br>IMI and 5-hydroxy metabolite @ 266 nm                                                                              | <b>DAD:</b> 245 and 266 nm<br>Acetamiprid and N-Desmethyl metabolite @245 nm<br>IMI and 5-hydroxy metabolite @ 266 nm |                                                                                                                                                                                                                                                                                                                                                                                                                    |

5

6 **Table S3.  $\mu$ HPLC and LC-MS Components**

| <b><math>\mu</math>HPLC</b>              | <b>LC-MS</b>                                                  |
|------------------------------------------|---------------------------------------------------------------|
| Thermo-Dionex Ultimate 3000              | Agilent 1200 $\mu$ HPLC                                       |
| Solvent delivery system                  | Binary solvent delivery system                                |
| Refrigerated autosampler (6 °C)          | Degasser                                                      |
| Heated column compartment (40 °C)        | Refrigerated autosampler (20 °C)                              |
| Diode array detector (DAD); 245 & 266 nm | Heated column compartment (30 °C)                             |
|                                          | Diode array detector (DAD); 245 & 266 nm                      |
|                                          | Agilent 1200 LC coupled to a 6410 series triple-quadrupole MS |

7

8 **Table S4. Physical and experimental properties of available standards for chemical**  
9 **identification.**

| Chemical Name                    | Acronym | Classification | LogKow | Absorbance Max (nm) | Retention Time (R <sub>f</sub> ) min |
|----------------------------------|---------|----------------|--------|---------------------|--------------------------------------|
| Acetamiprid                      | AC      | Parent         | 2.55   | 245                 | 5.01                                 |
| Acetamiprid-N-desmethyl          | AC-1    | Metabolite     | 2.34   | 224                 | 4.68                                 |
| 6-chloronicotinic acid           | AC-2    | Metabolite     | 1.33   | 245                 | 2.37                                 |
| N-cyano-N'-methyl-ethanimidamide | AC-3    | Metabolite     | 1.17   | 224                 | 1.18                                 |
| Imidacloprid                     | IMI     | Parent         | 2.21   | 266                 | 4.73                                 |
| 5-hydroxy-Imidacloprid           | IMI-1   | Metabolite     | 2.01   | 266                 | 4.36                                 |
| Imidacloprid Olefin              | IMI-2   | Metabolite     | 1.82   | 266                 | 4.19                                 |

10 *LogKow calculated from EPIWEBv4.1*

11 *Data was obtained from Chemspider and experimental analysis*

12

13 **Figure S1: Analytical approach used for the quantification and identification of the main**  
14 **metabolites of Imidacloprid (IMI) and Acetamiprid (AC) formed after in *in vitro* chemical**  
15 **exposure of RBT and rat liver microsomes and RBT liver slices.**

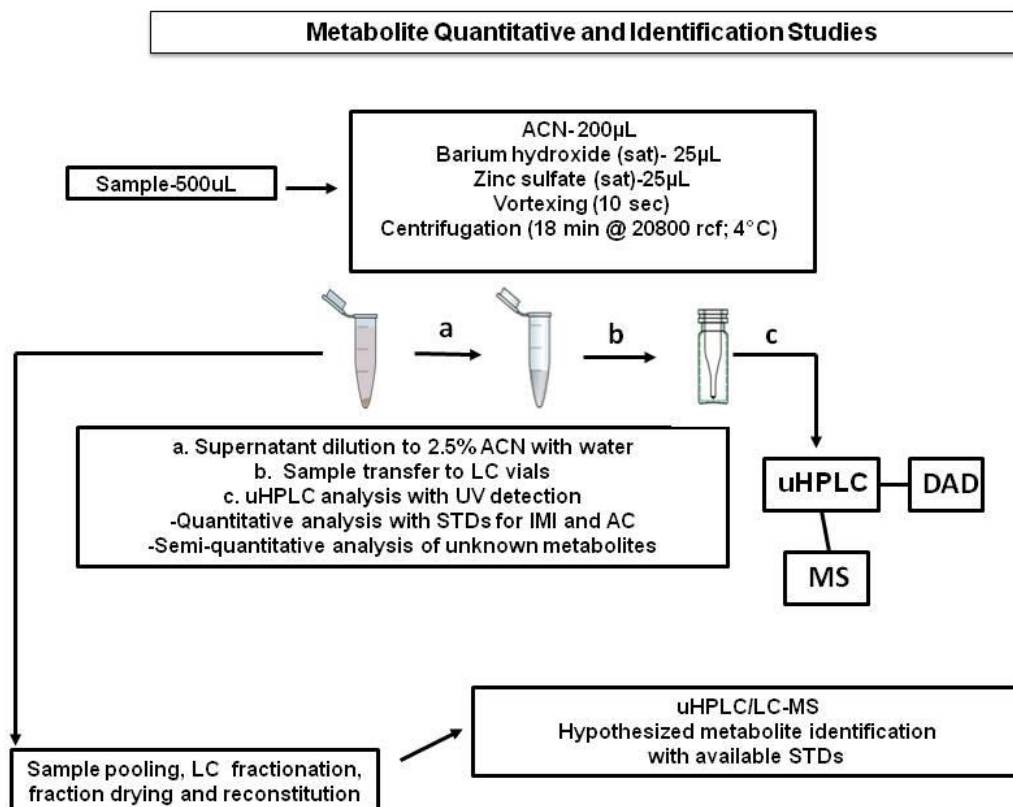

16

17

18 **Figure S2: LC-MS Identification of IMI Metabolite**

19

20 **A: 4% ACN, 1% Acetic acid/water, pH 4.0**  
 21 **B: 99% ACN, 1% Acetic acid/water; 0.4 mL /min**  
 22 **5-hydroxy-IMI Standard 50µM; (upper trace)**  
 23 **IMI-1 Fractionated Unknown: (lower trace)**

24

25 **Counts vs. Acquisition Time (min)**

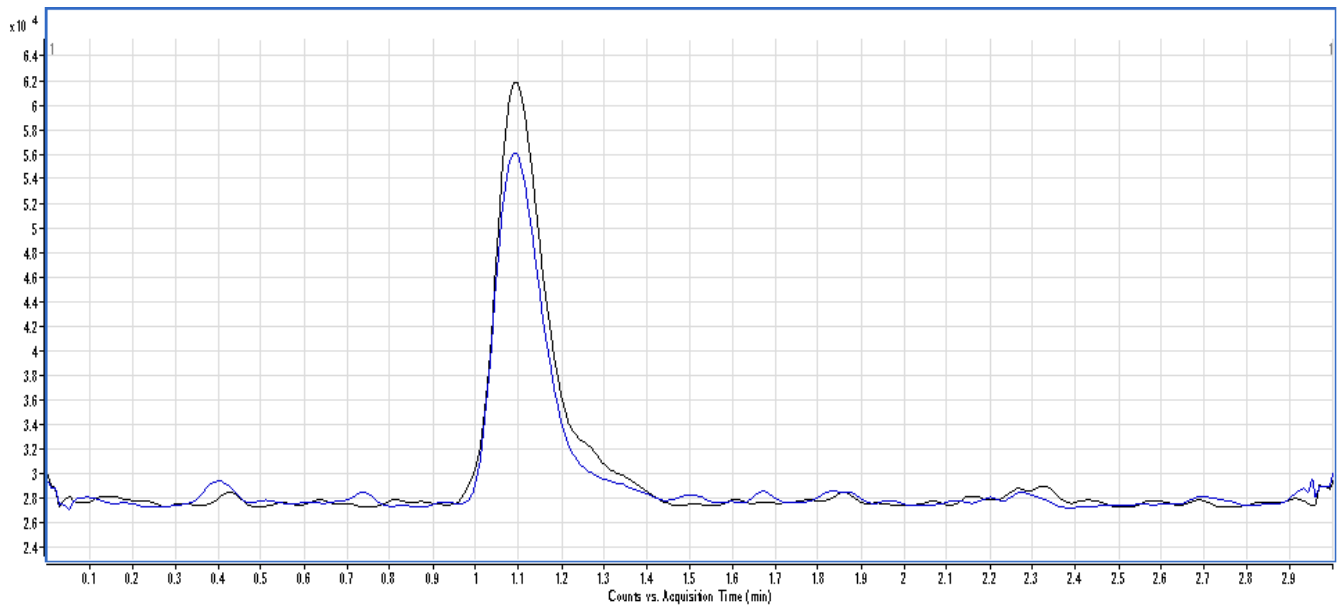

26

27

28

29

**5-hydroxy-IMI (IMI-1) Standard  
LC-MS/MS product ion mass spectrum of  $m/z$  272.1 ( $[M+H]^+$ )**

30

31 **Counts (%) vs. Mass-to-Charge ( $m/z$ )**

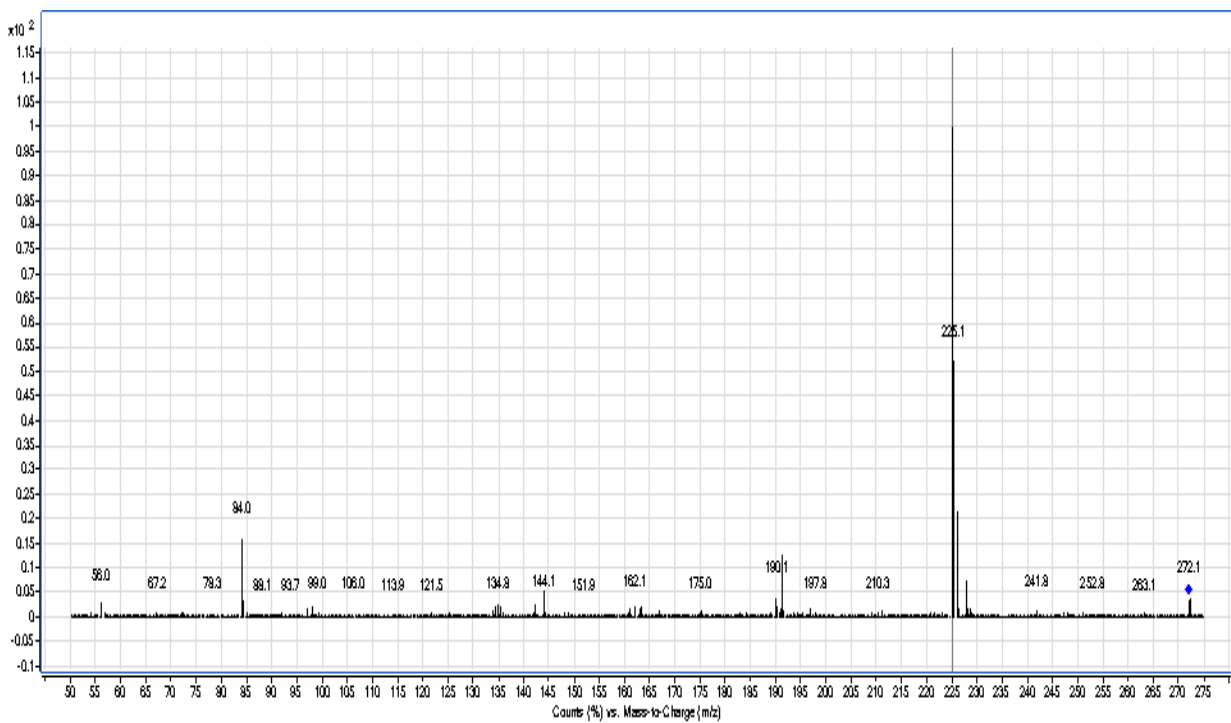

32

33

**IMI-1 Fractionated Unknown**

34

LC-MS/MS product ion mass spectrum of  $m/z$  272.1 ( $[M+H]^+$ )

35

36 Counts (%) vs. Mass-to-Charge ( $m/z$ )

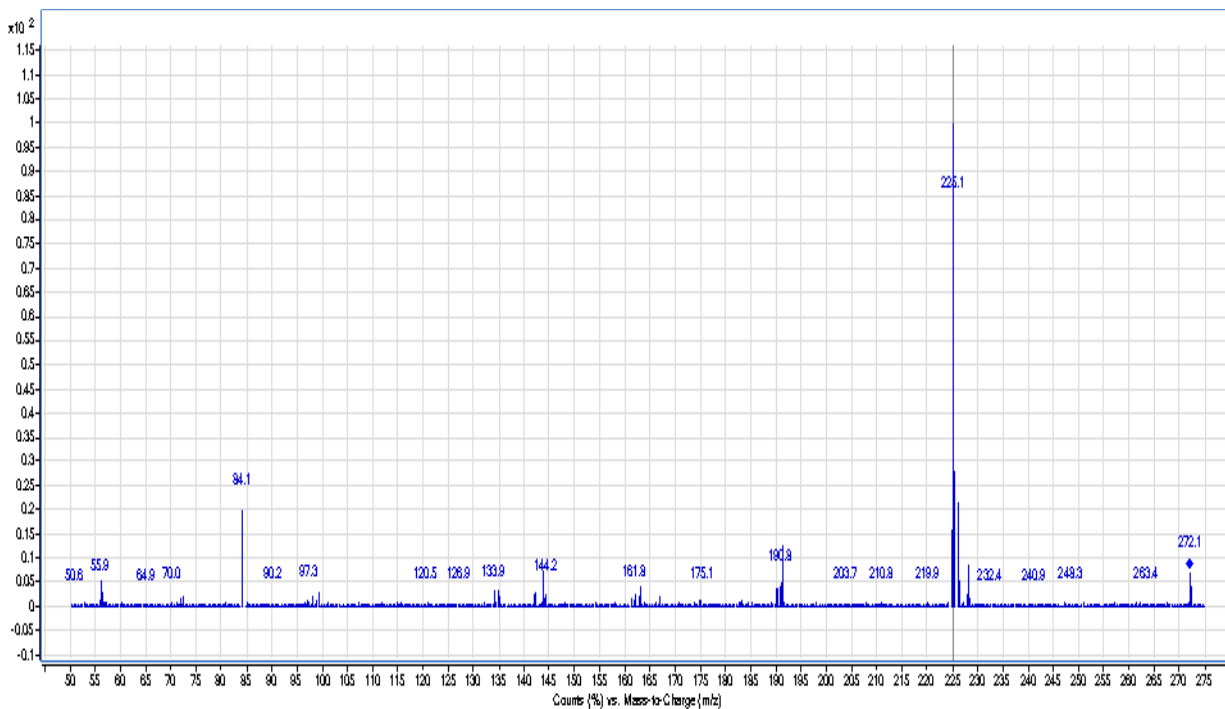

37

38

39 **Figure S3: LC-MS Identification of AC Metabolite**

40

LC-MS Full Scan; 3 min isocratic LC program

41

A: 4% ACN, 1% Acetic acid/water, pH 4.0

42

B: 99% ACN, 1% Acetic acid/water; 0.4 mL/min

43

Acetamidrid-N-Desmethyl Standard 50 $\mu$ M; (upper trace)

45

AC-1 Fractionated Unknown: (lower trace)

46

47

48 Counts vs. Acquisition Time (min)

49

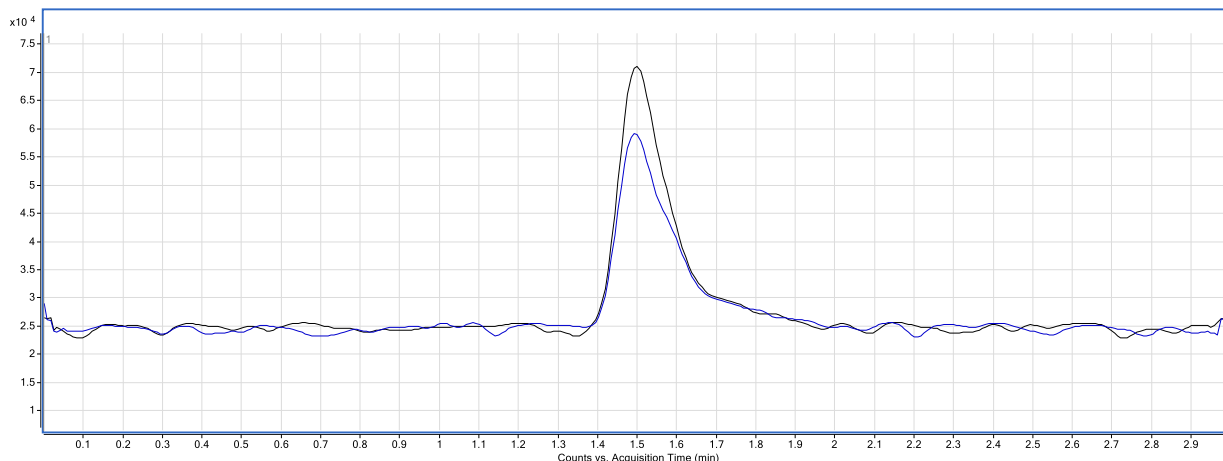

50

51

52

53

Acetamidiprid-N-Desmethyl Standard  
LC-MS/MS product ion mass spectrum of  $m/z$  209.1 ( $[M+H]^+$ )

54

55

56 Counts (%) vs. Mass-to-Charge ( $m/z$ )

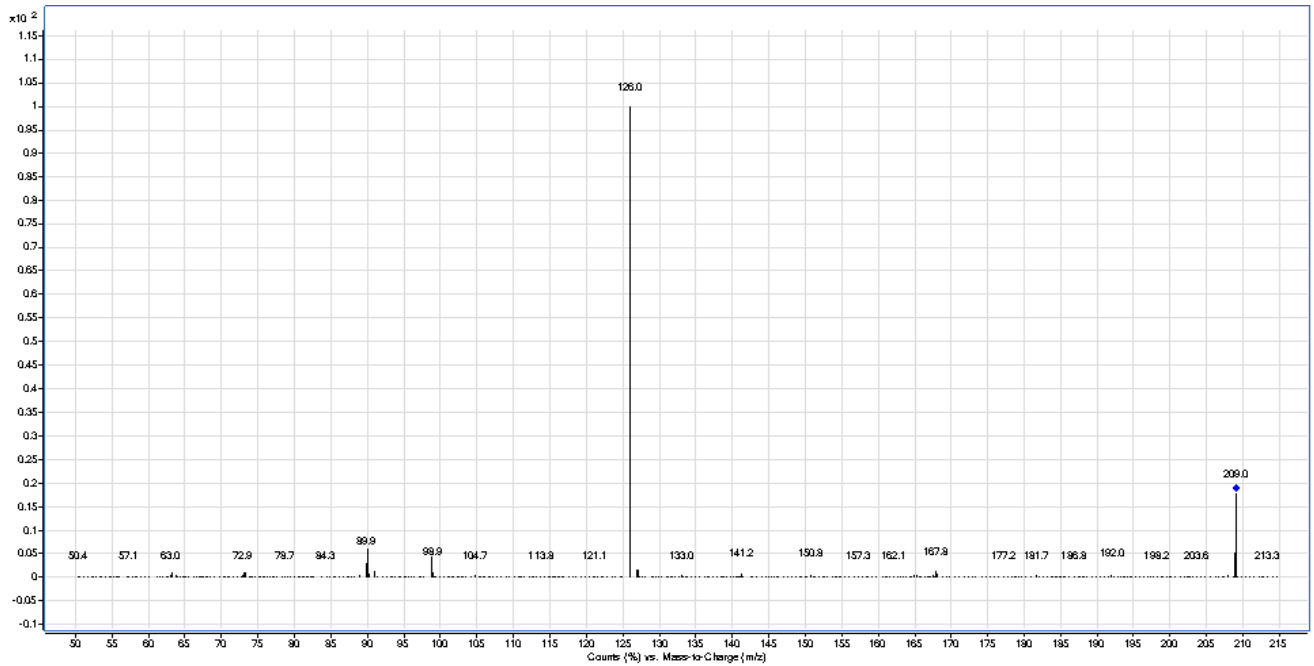

57

58

59

AC-1 Fractionated Unknown  
LC-MS/MS product ion mass spectrum of  $m/z$  209.2 ( $[M+H]^+$ )

60

61

62 Counts (%) vs. Mass-to-Charge ( $m/z$ )

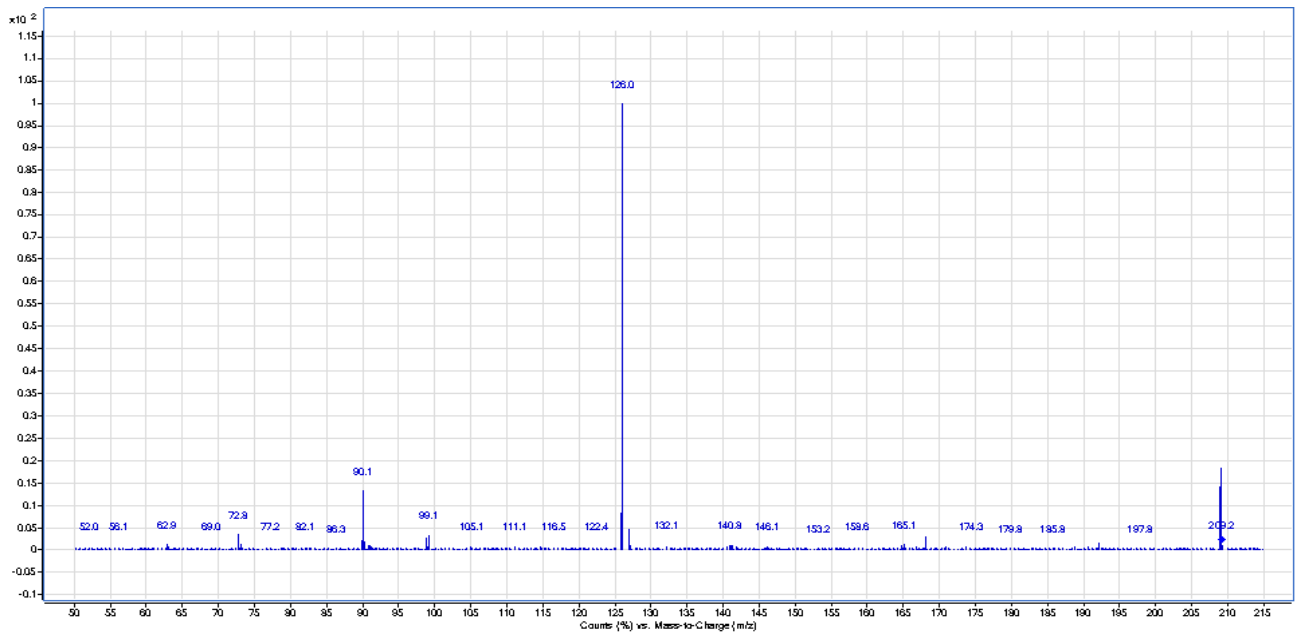

63

64

65

66

LC-MS Full Scan; 3 min isocratic LC program

67

**Figure S4: LC-DAD trace for liver slice media following 96 and 120 hour**

68

**exposure to 200  $\mu$ M IMI versus a media blank.**

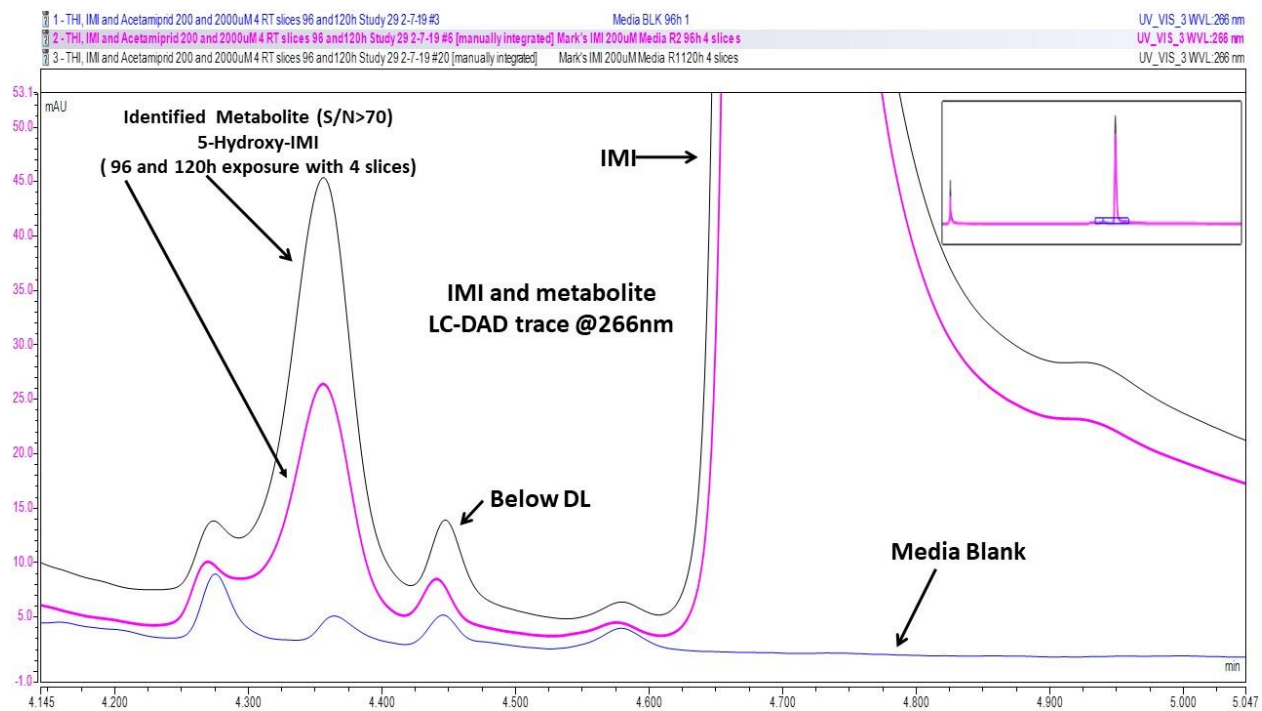

69



70 **Figure S5: LC-DAD trace for liver slice media following a 120 hour exposure**  
71 **to 2000  $\mu$ M AC versus a media blank.**

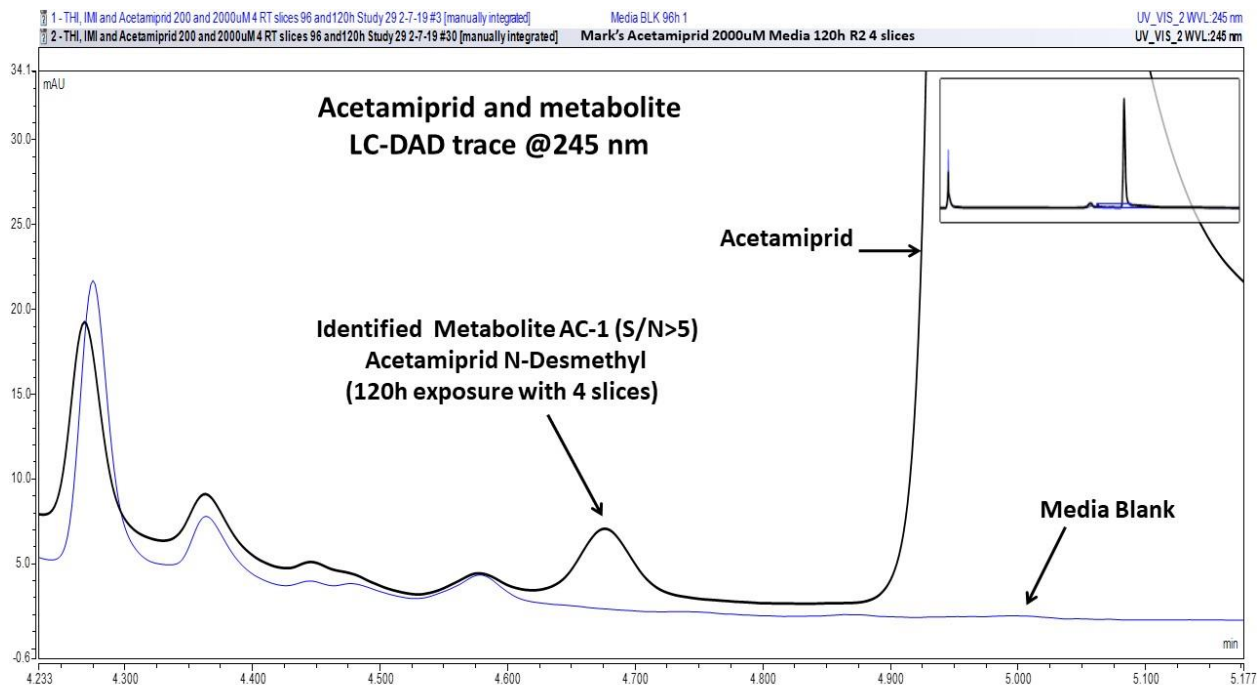

72
